# Supplementary material for: Bioactive Metabolites from Mangrove Endophytic Fungus Aspergillus sp. 16-5B
Source: PubMed Central journal article supplement (PMC4446620; doi:10.3390/md13053091), 2015-05-19
Supplement: marinedrugs-13-03091-s001.pdf [file marinedrugs-13-03091-s001.pdf]

# Supplementary Information

| Contents                                                                                                                                                | page |
|---------------------------------------------------------------------------------------------------------------------------------------------------------|------|
| <b>Figure S1.</b> HREIMS spectrum of Compound 1                                                                                                         | S2   |
| <b>Figure S2.</b> <sup>1</sup> H NMR (500 MHz, CDCl <sub>3</sub> ) spectrum of Compound 1                                                               | S2   |
| <b>Figure S3.</b> <sup>13</sup> C NMR (125MHz, CDCl <sub>3</sub> ) spectrum of Compound 1                                                               | S3   |
| <b>Figure S4.</b> <sup>1</sup> H– <sup>1</sup> H COSY spectrum of Compound 1                                                                            | S3   |
| <b>Figure S5.</b> HSQC spectrum of Compound 1                                                                                                           | S4   |
| <b>Figure S6.</b> HMBC spectrum of Compound 1                                                                                                           | S4   |
| <b>Figure S7.</b> NOESY spectrum of Compound 1                                                                                                          | S5   |
| <b>Figure S8.</b> HREIMS spectrum of Compound 2                                                                                                         | S5   |
| <b>Figure S9.</b> <sup>1</sup> H NMR (500 MHz, acetone- <i>d</i> <sub>6</sub> ) spectrum of Compound 2                                                  | S6   |
| <b>Figure S10.</b> <sup>13</sup> C NMR (125MHz, acetone- <i>d</i> <sub>6</sub> ) spectrum of Compound 2                                                 | S6   |
| <b>Figure S11.</b> HSQC spectrum of Compound 2                                                                                                          | S7   |
| <b>Figure S12.</b> HMBC spectrum of Compound 2                                                                                                          | S7   |
| <b>Figure S13.</b> NOESY spectrum of Compound 2                                                                                                         | S8   |
| <b>Figure S14.</b> HREIMS spectrum of Compound 3                                                                                                        | S8   |
| <b>Figure S15.</b> <sup>1</sup> H NMR (500 MHz, methanol- <i>d</i> <sub>4</sub> ) spectrum of Compound 3                                                | S9   |
| <b>Figure S16.</b> <sup>13</sup> C NMR (125 MHz, Methanol- <i>d</i> <sub>4</sub> ) (A) and DEPT spectra of Compound 3 (B)                               | S10  |
| <b>Figure S17.</b> HSQC spectrum of Compound 3                                                                                                          | S11  |
| <b>Figure S18.</b> HMBC spectrum of Compound 3                                                                                                          | S11  |
| <b>Figure S19.</b> HREIMS spectrum of Compound 4                                                                                                        | S12  |
| <b>Figure S20.</b> <sup>1</sup> H NMR (500 MHz, methanol- <i>d</i> <sub>4</sub> ) spectrum of Compound 4                                                | S12  |
| <b>Figure S21.</b> <sup>13</sup> C NMR (125 MHz, Methanol- <i>d</i> <sub>4</sub> ) (A) and DEPT spectra of Compound 4 (B)                               | S13  |
| <b>Figure S22.</b> <sup>1</sup> H– <sup>1</sup> H COSY spectrum of Compound 4                                                                           | S14  |
| <b>Figure S23.</b> HSQC spectrum of Compound 4                                                                                                          | S14  |
| <b>Figure S24.</b> HMBC spectrum of Compound 4                                                                                                          | S15  |
| <b>Figure S25.</b> The structures (A) and calculated ECD spectra of the two isomers of 5 <i>R</i> ,6 <i>R</i> -1 (B) and 5 <i>S</i> ,6 <i>S</i> -1 (C). | S15  |
| <b>Figure S26.</b> DFT-optimized low-energy structures (1-1–1-5) for 5 <i>R</i> ,6 <i>R</i>                                                             | S17  |
| <b>Figure S27.</b> CD spectrum of Compound 4                                                                                                            | S18  |

Instrument: MAT 95XP(Thermo)  
D:\DATA-HR\14\101502-5b-5-1-c1

10/15/2014 11:04:18 AM

5B-5-1

101502-5b-5-1-c1 #8 RT: 0.25 AV: 1 NL: 2.02E3  
T: + c EI Full ms [ 370.50-382.50]

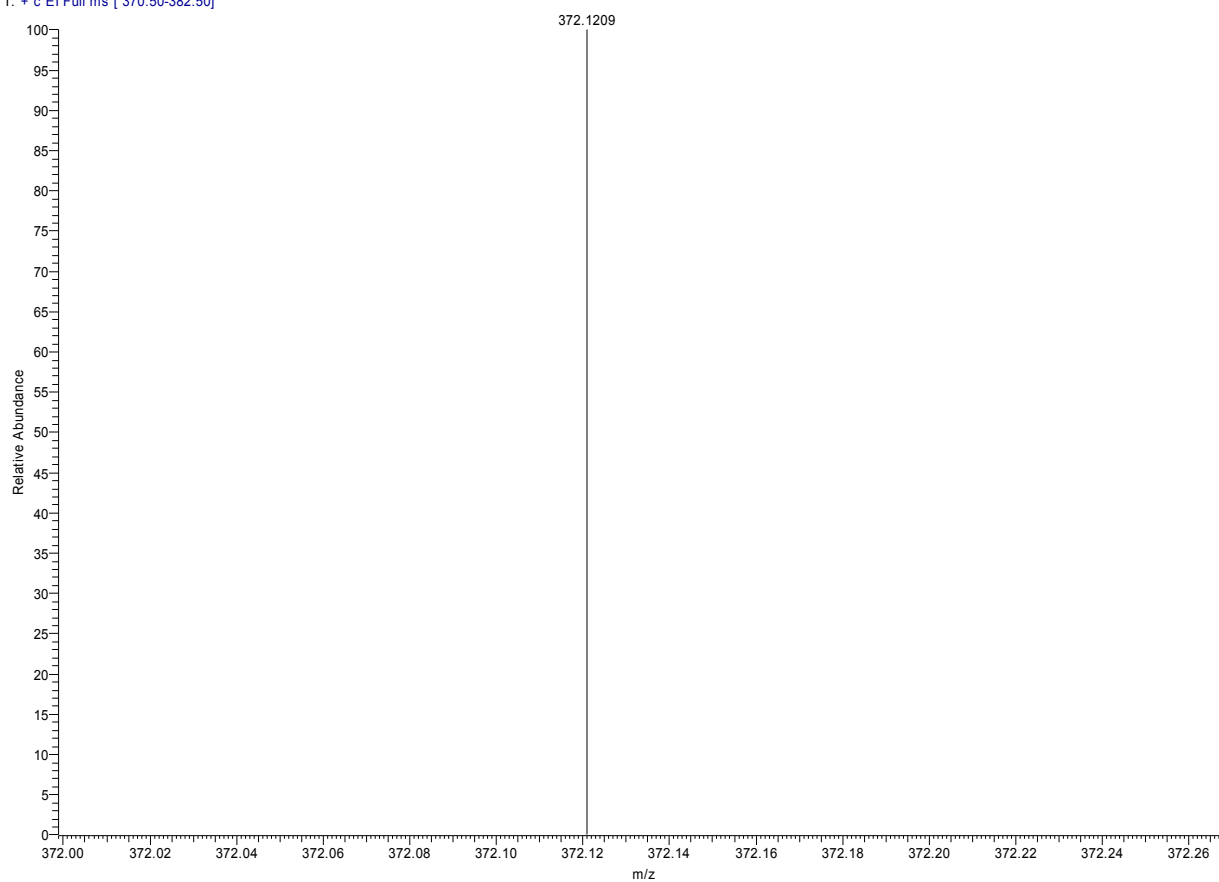

Figure S1. HREIMS spectrum of Compound 1.

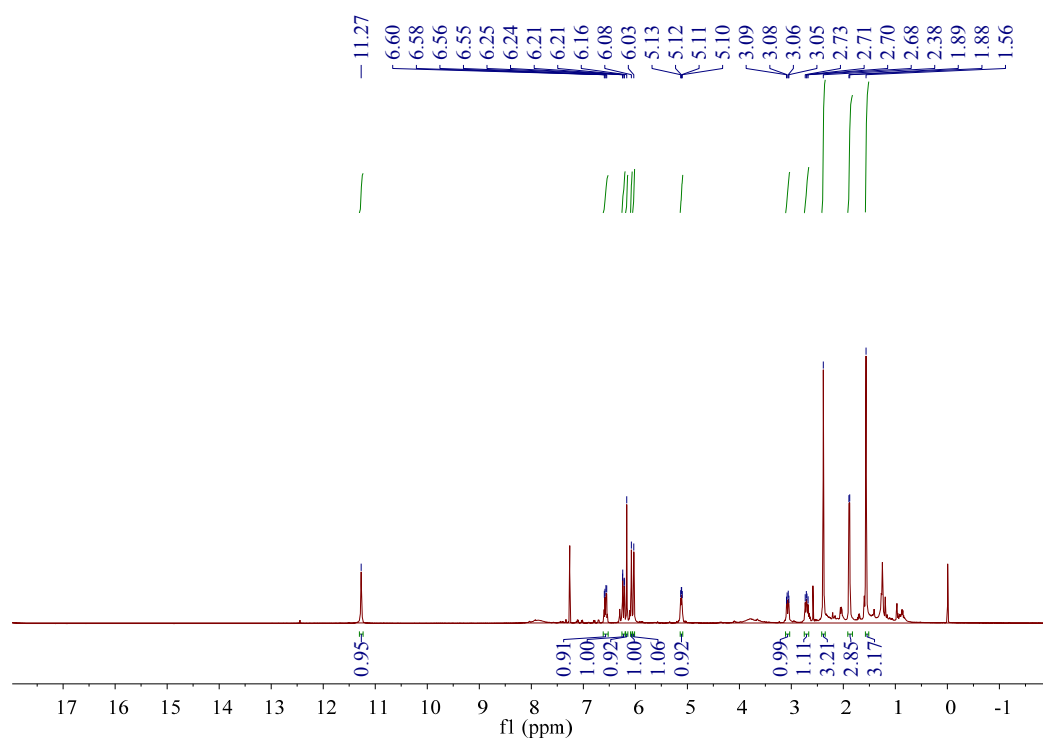

Figure S2. <sup>1</sup>H NMR (500 MHz, CDCl<sub>3</sub>) spectrum of Compound 1.

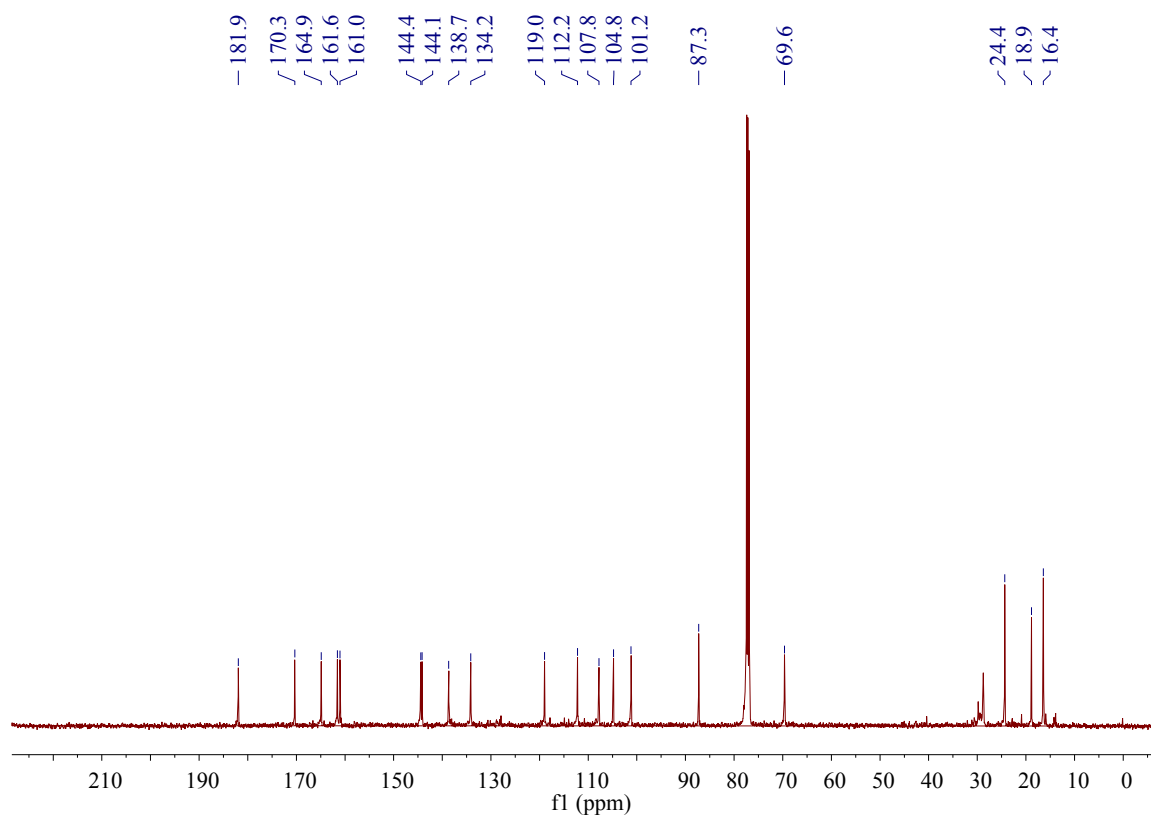

**Figure S3.** <sup>13</sup>C NMR (125 MHz, CDCl<sub>3</sub>) spectrum of Compound 1.

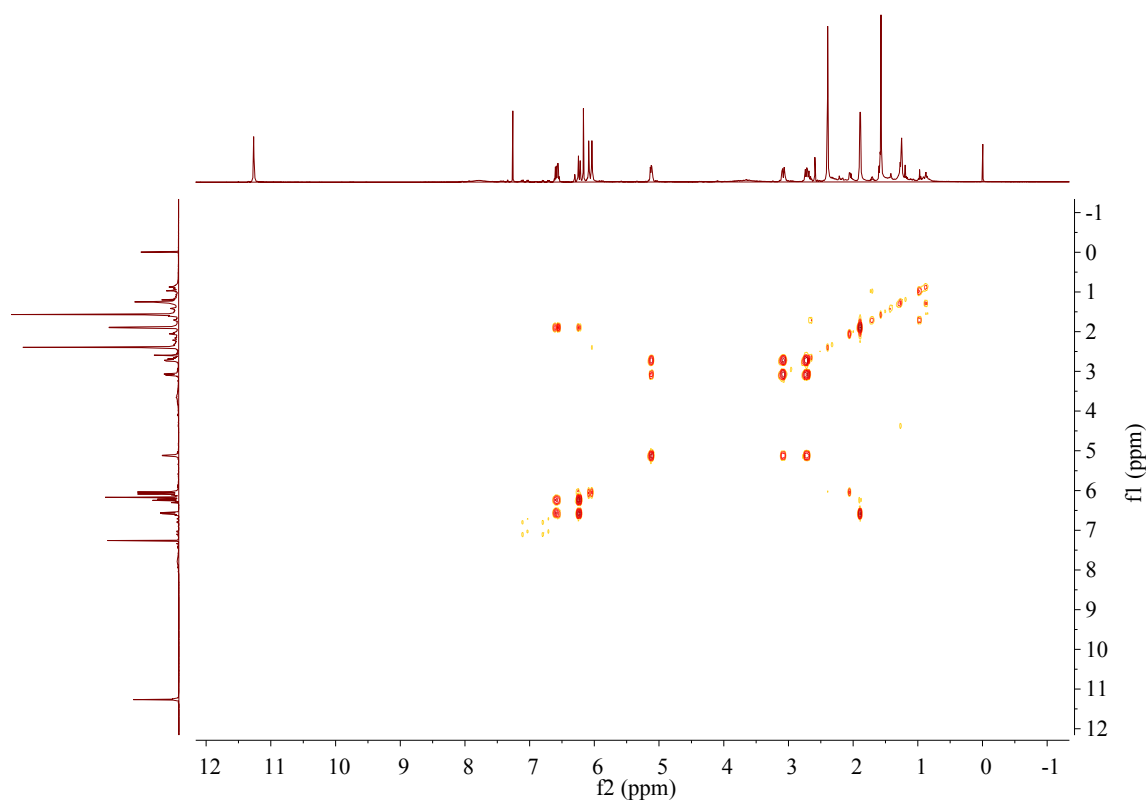

**Figure S4.** <sup>1</sup>H-<sup>1</sup>H COSY spectrum of Compound 1.

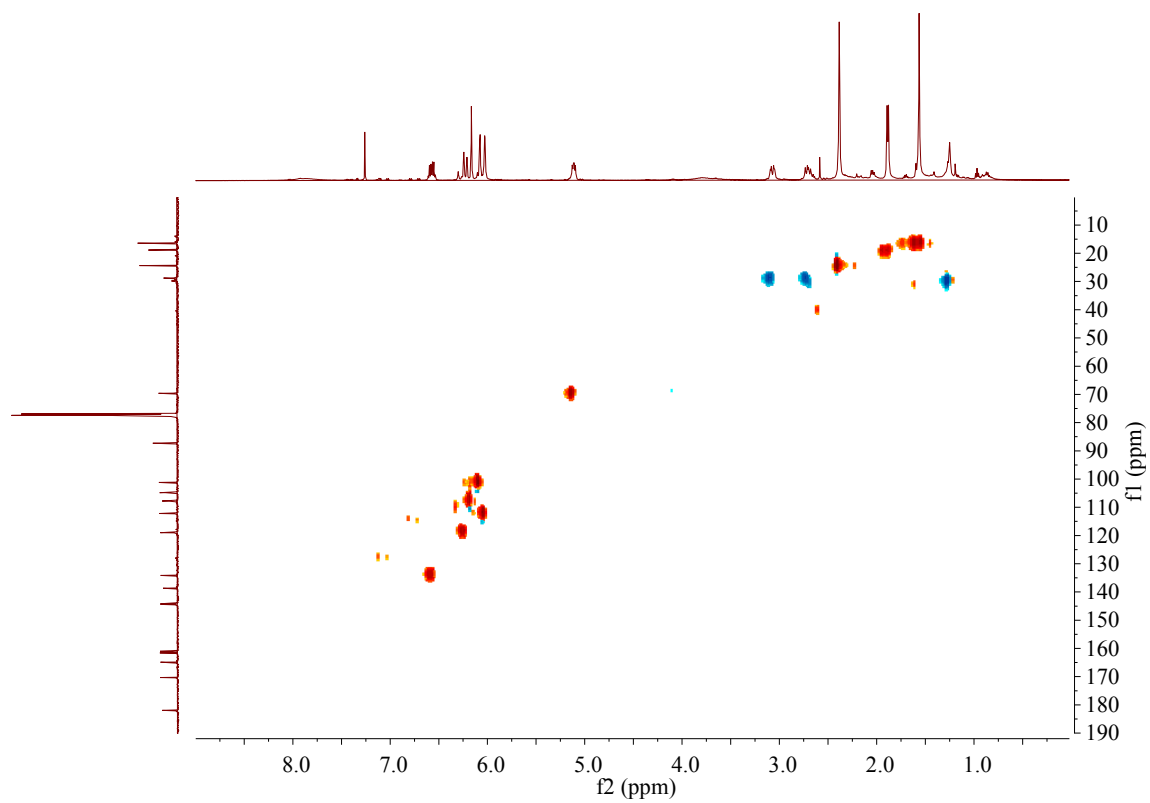

**Figure S5.** HSQC spectrum of Compound 1.

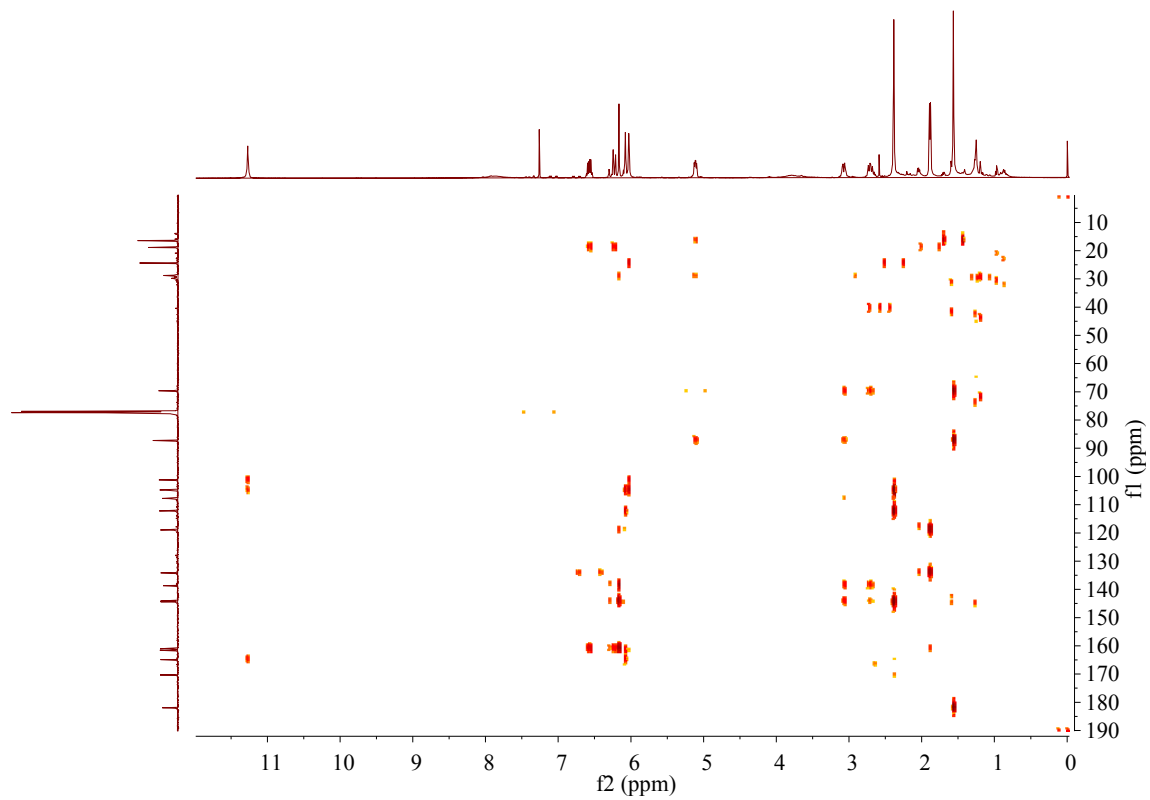

**Figure S6.** HMBC spectrum of Compound 1.

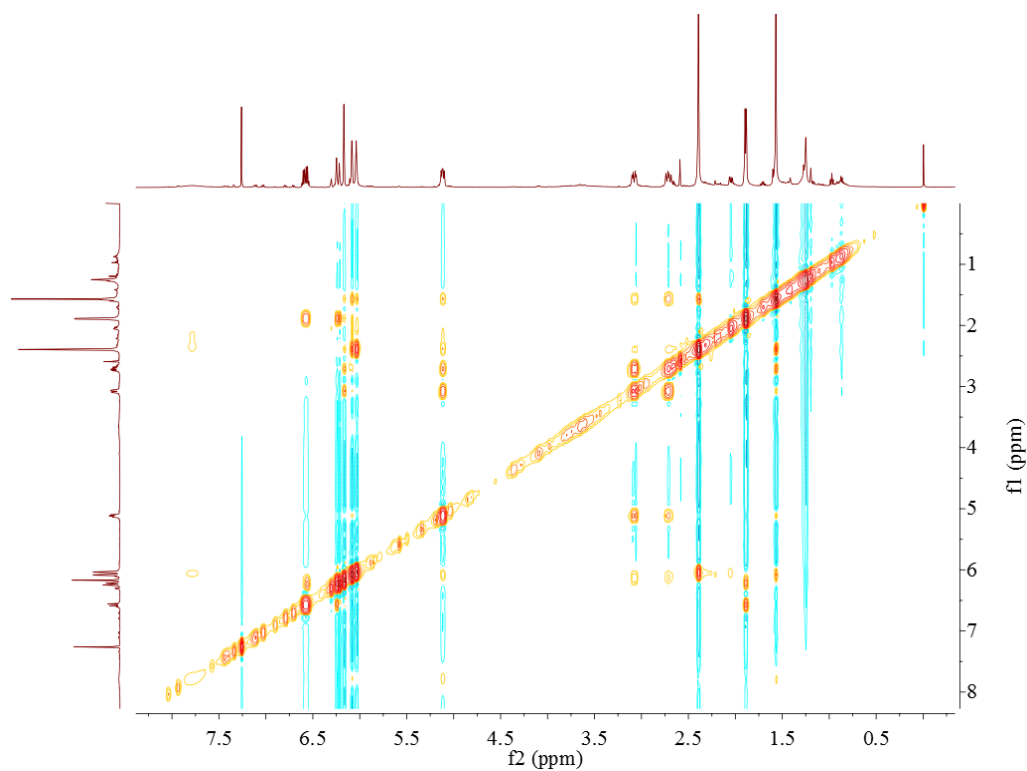

**Figure S7.** NOESY spectrum of Compound 1.

Instrument: MAT 95XP (Thermo)  
D:\DATA-HR\15\011901-hy9-5-1-c1

1/19/2015 10:18:20 AM

HY9-5-1

011901-hy9-5-1-c1 #3 RT: 0.12 AV: 1 NL: 1.67E4  
T: + e EI Full ms [ 240.50-257.50]

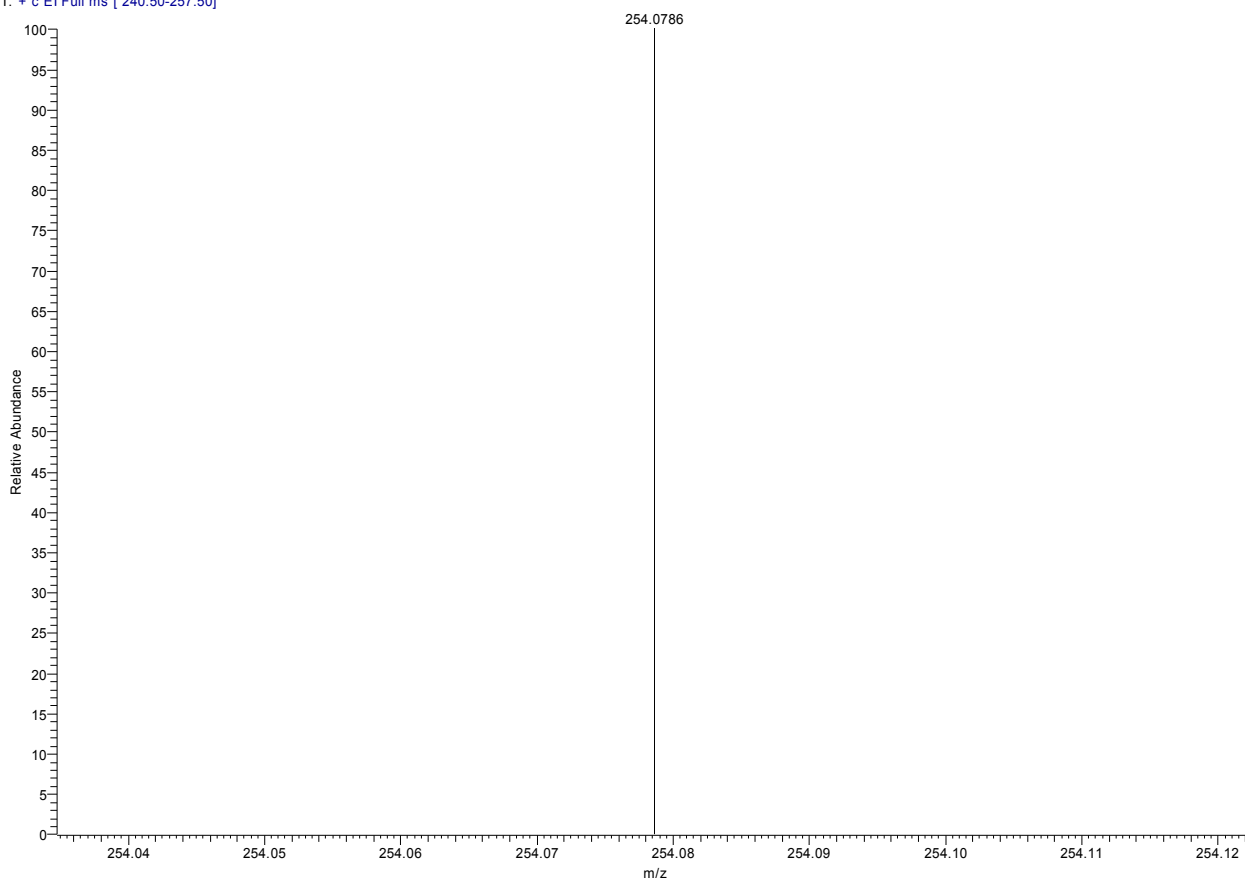

**Figure S8.** HREIMS spectrum of Compound 2.

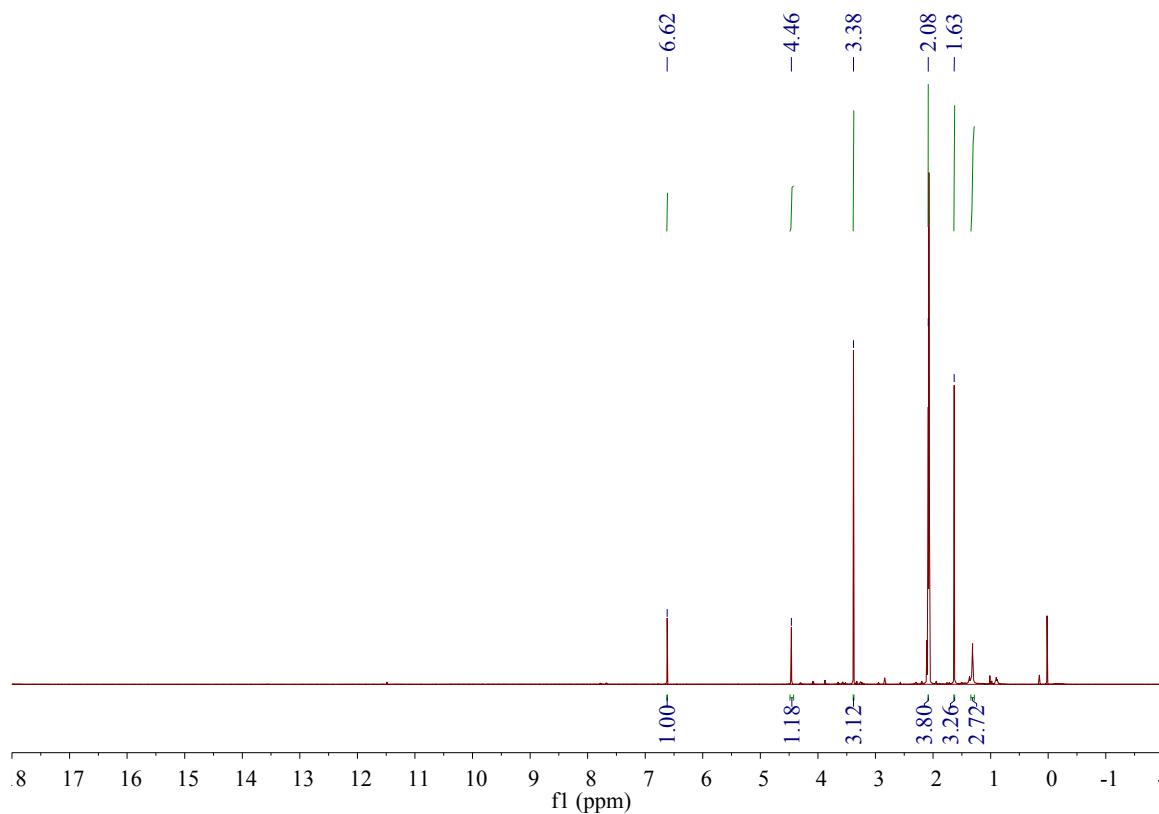

Figure S9. <sup>1</sup>H NMR (500 MHz, acetone-*d*<sub>6</sub>) spectrum of Compound 2.

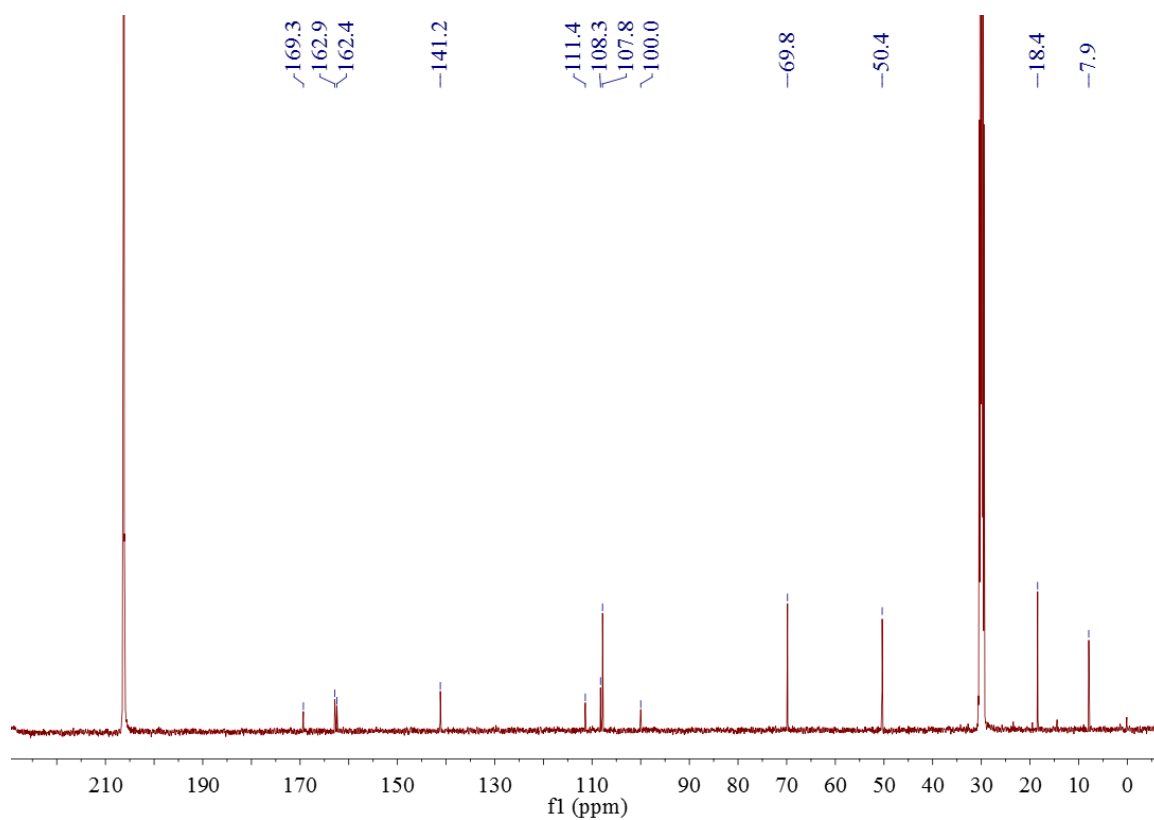

Figure S10. <sup>13</sup>C NMR (125 MHz, acetone-*d*<sub>6</sub>) spectrum of Compound 2.

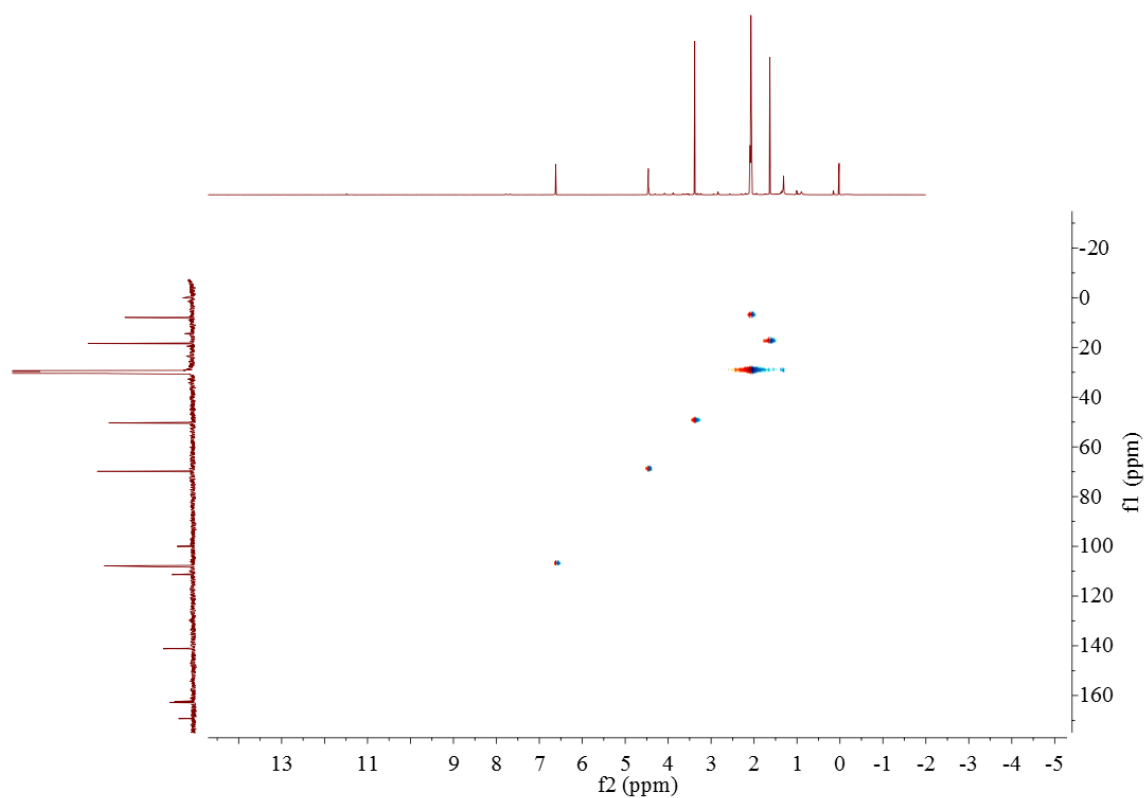

Figure S11. HSQC spectrum of Compound 2.

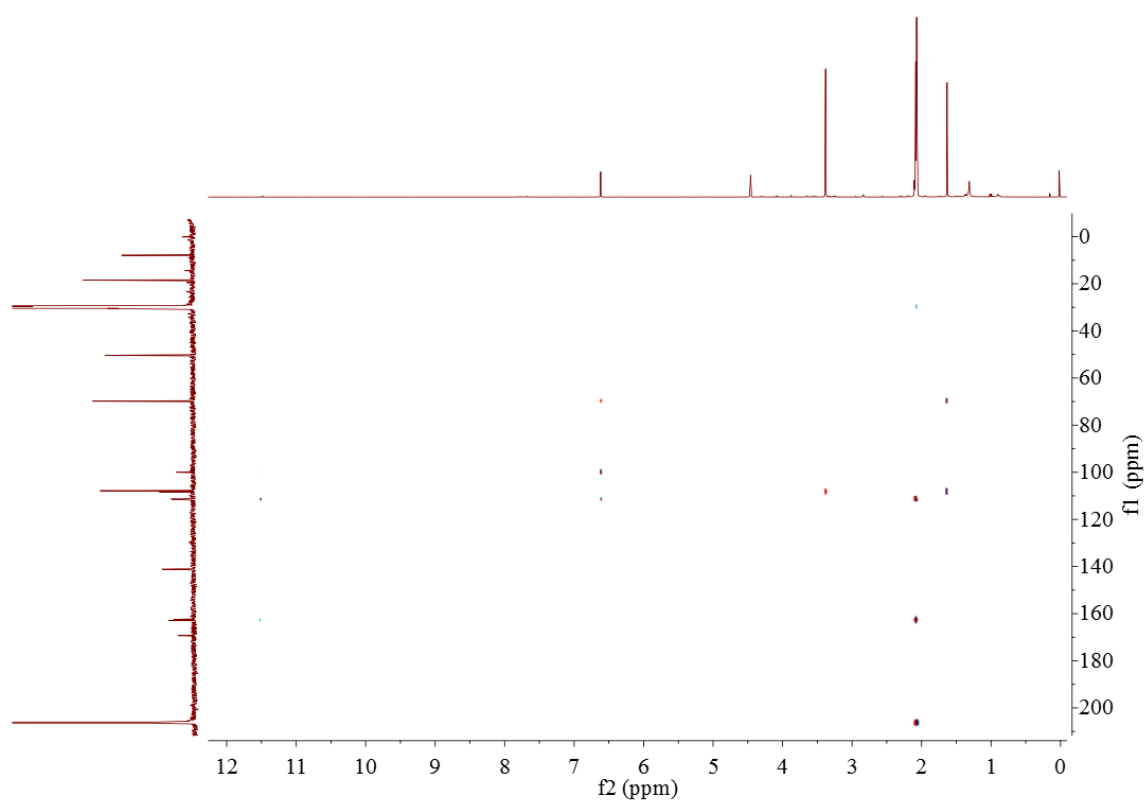

Figure S12. HMBC spectrum of Compound 2.

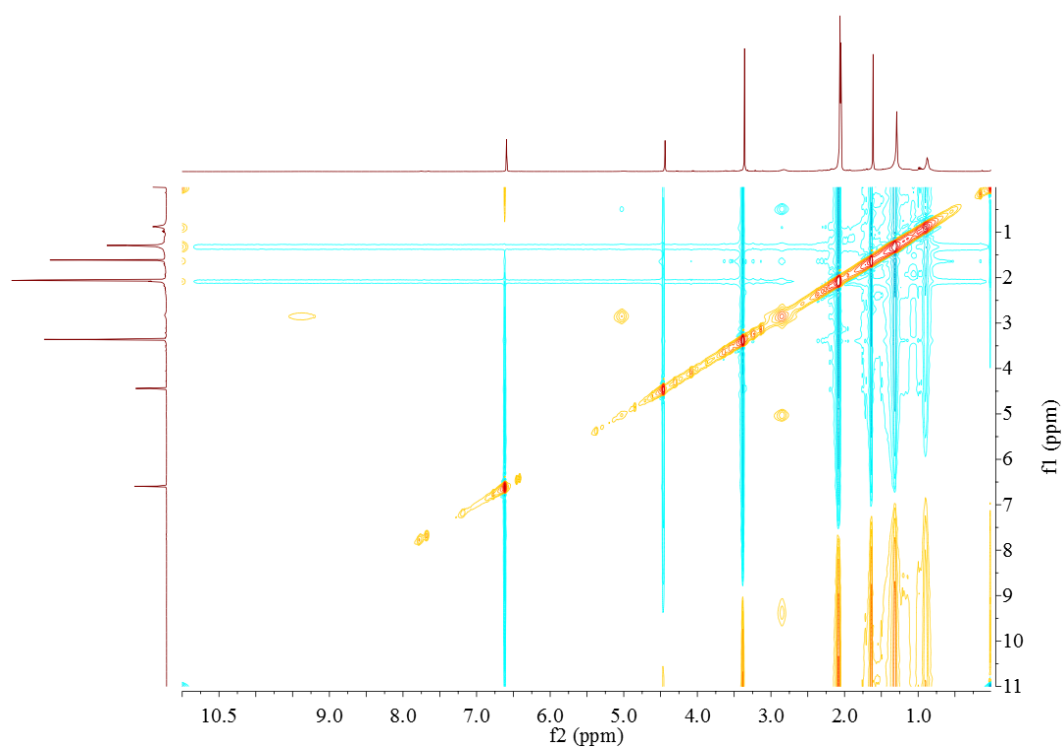

**Figure S13.** NOESY spectrum of Compound 2.

Instrument: MAT 95XP (Thermo)  
D:\DATA-HR\15\011902-hy9-3-1-1-c1

1/19/2015 10:25:06 AM

HY9-3-1-1

011902-hy9-3-1-1-c1 #9 RT: 0.34 AV: 1 NL: 3.83E4  
T: + c EI Full ms [ 240.50-257.50]

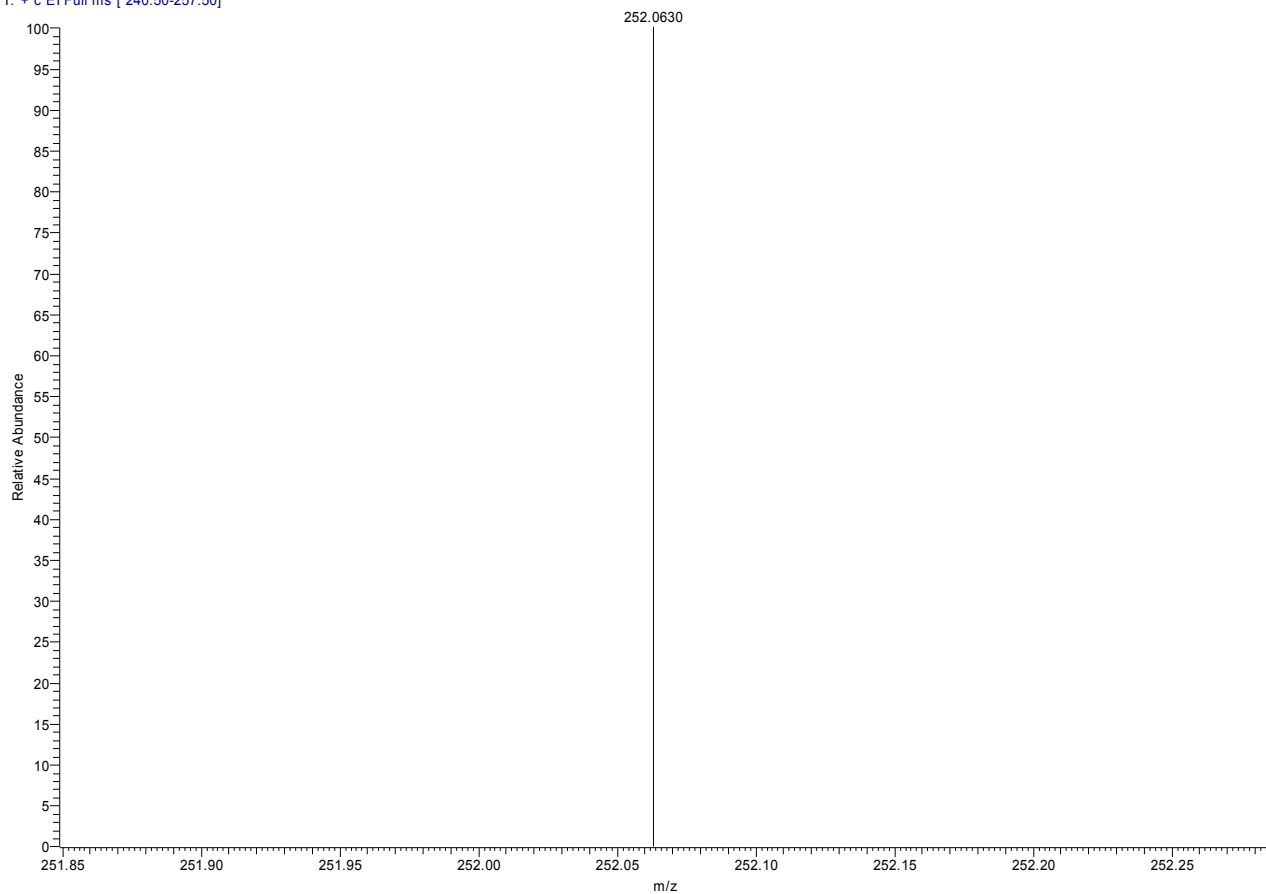

**Figure S14.** HREIMS spectrum of Compound 3.



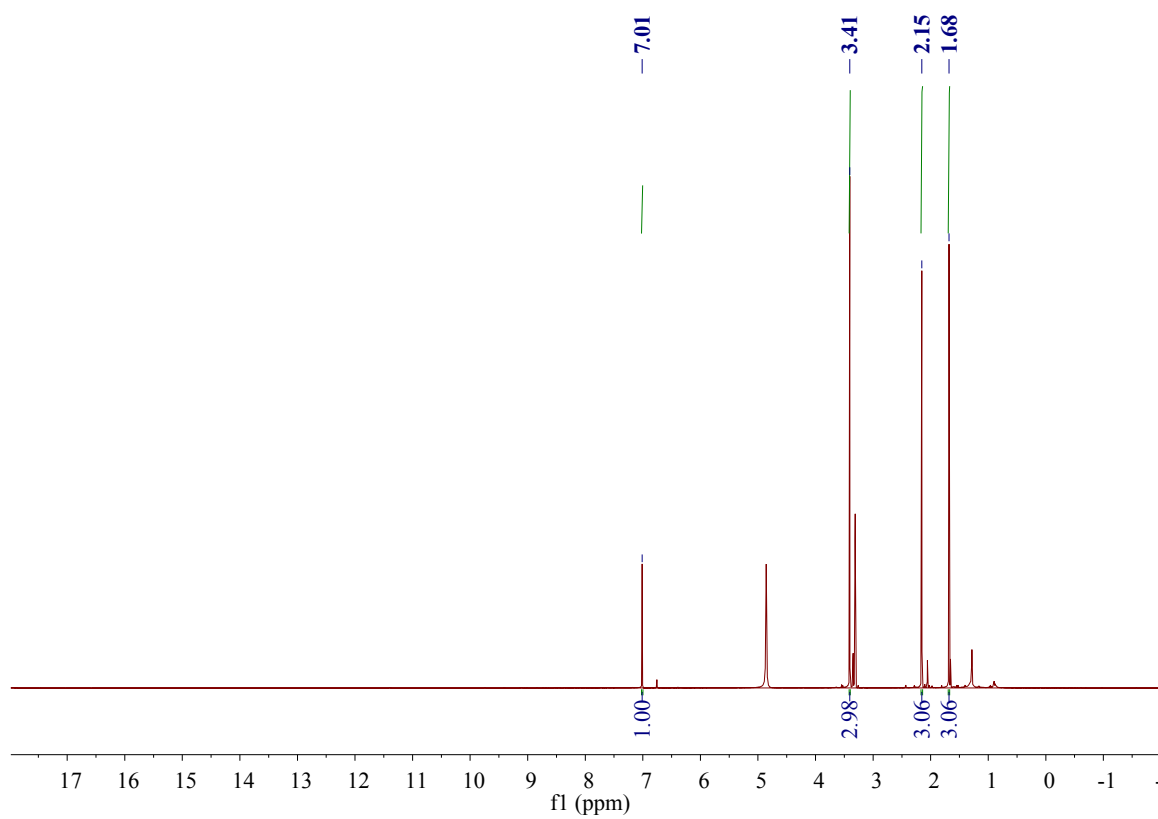

**Figure S15.**  $^1\text{H}$  NMR (500 MHz, Methanol- $d_4$ ) spectrum of Compound 3.

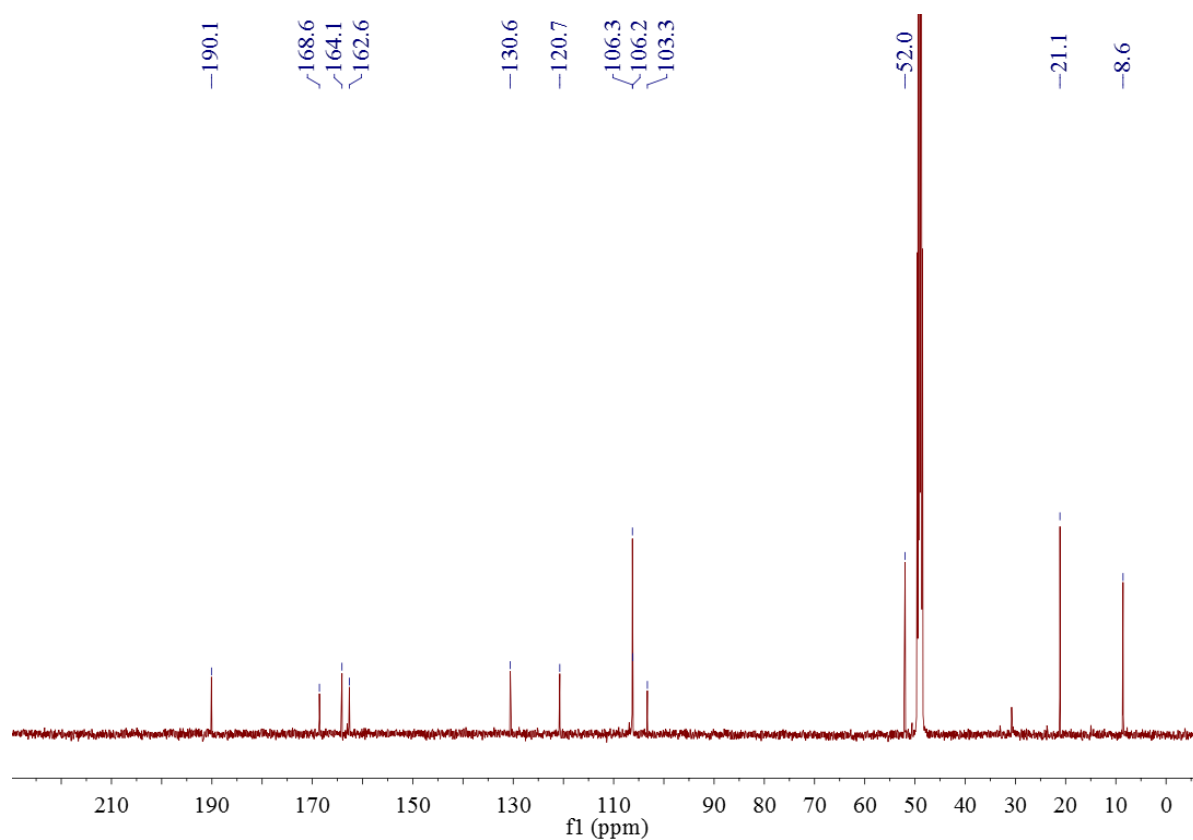

(A)

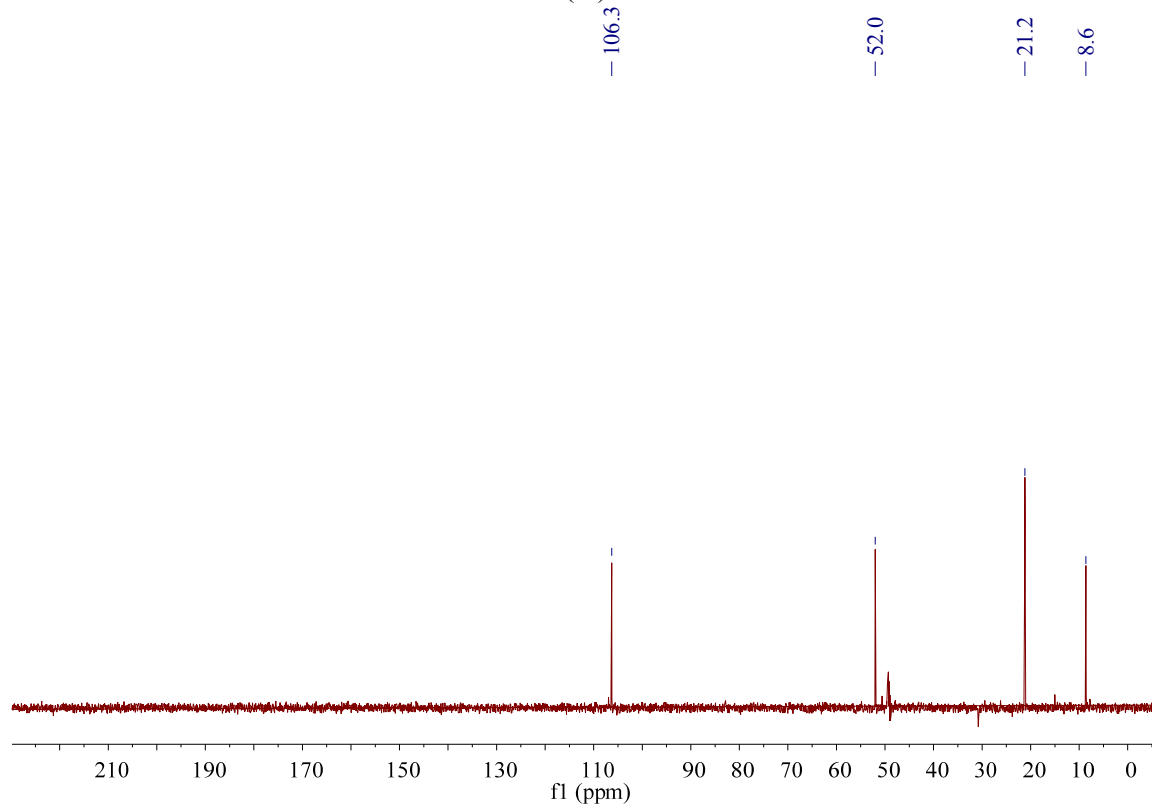

(B)

**Figure S16.**  $^{13}\text{C}$  NMR (125 MHz, Methanol- $d_4$ ) (A) and DEPT spectra of Compound **3** (B).

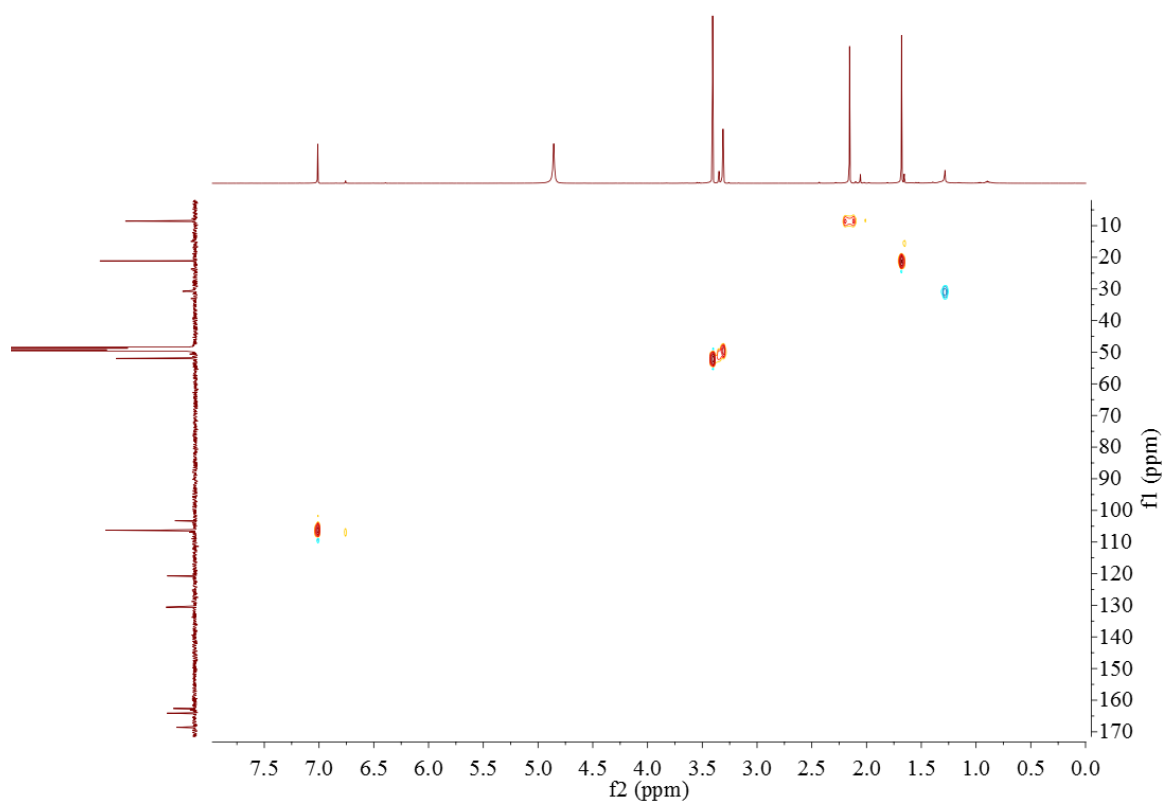

**Figure S17.** HSQC spectrum of Compound 3.

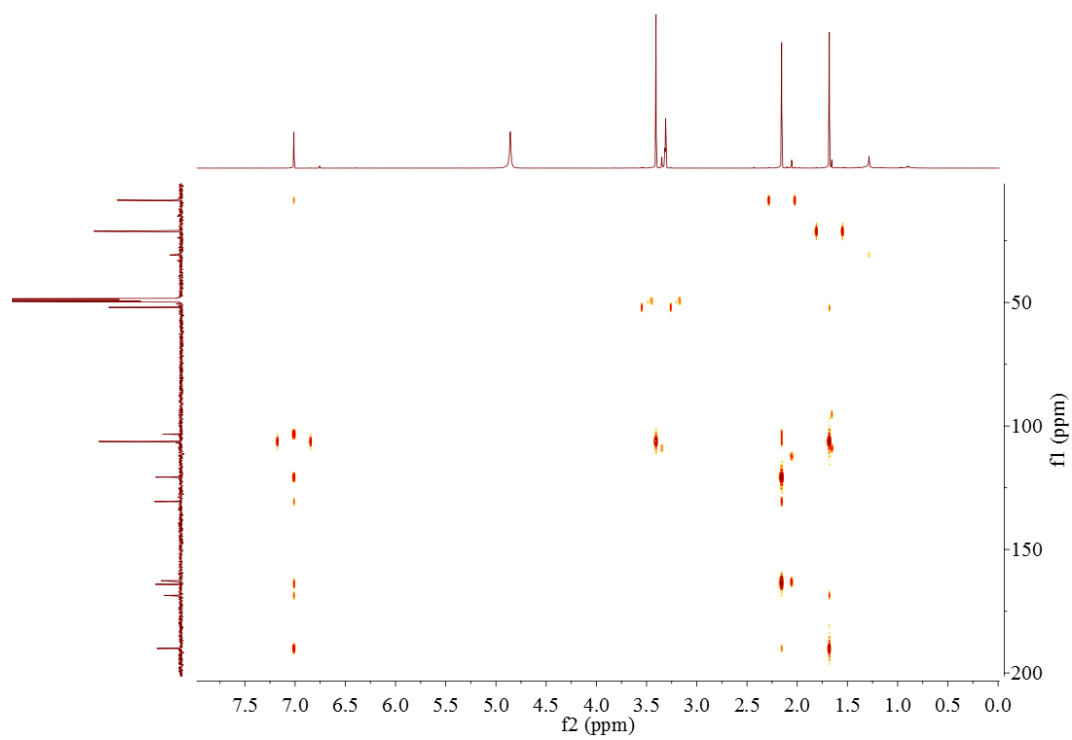

**Figure S18.** HMBC spectrum of Compound 3.

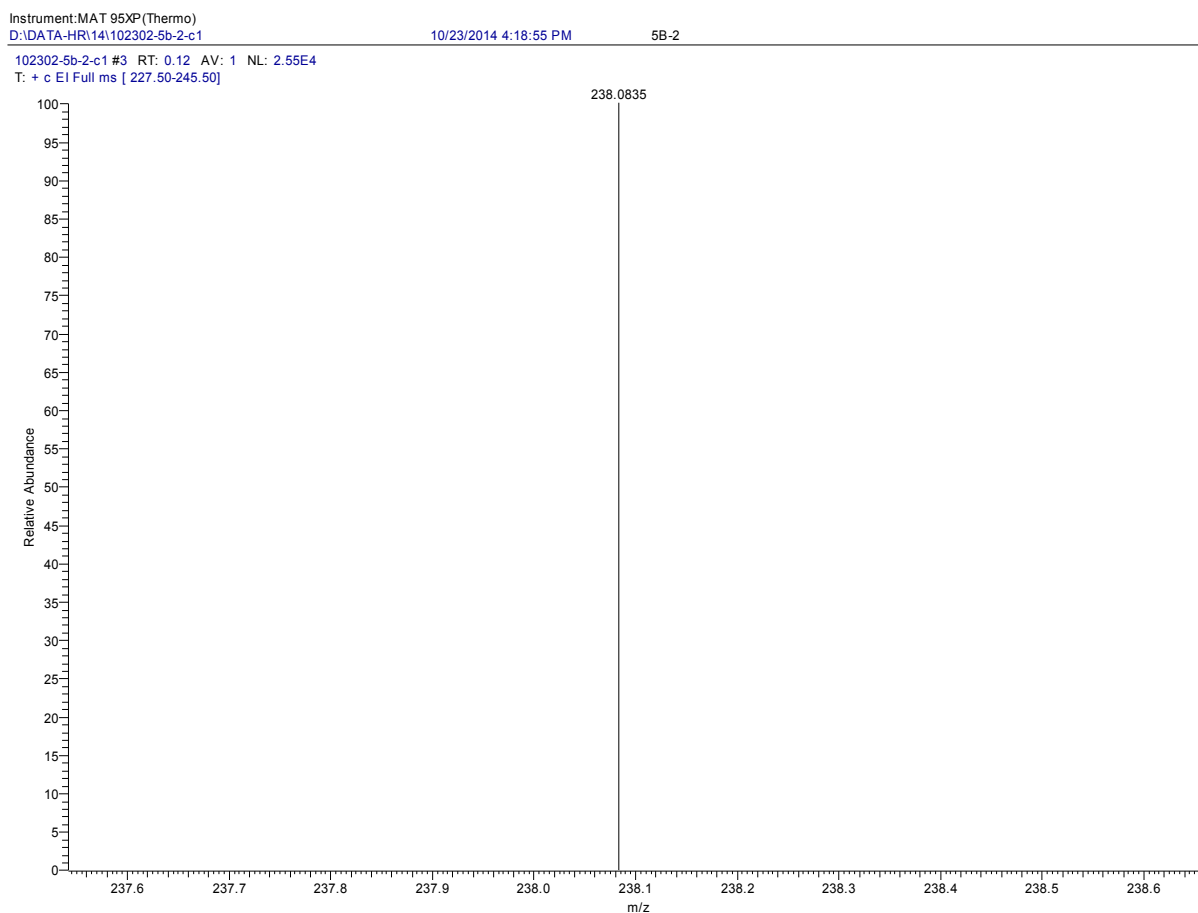

Figure S19. HREIMS spectrum of Compound 4.

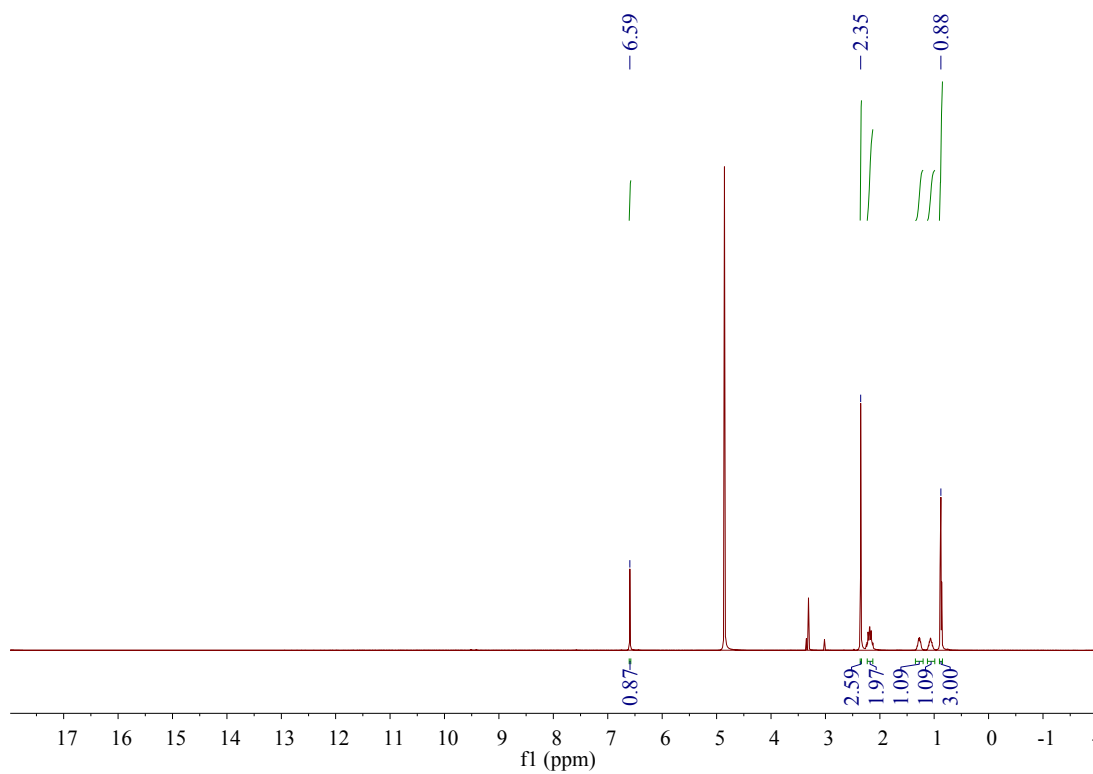

Figure S20. <sup>1</sup>H NMR (500 MHz, Methanol-*d*<sub>4</sub>) spectrum of Compound 4.

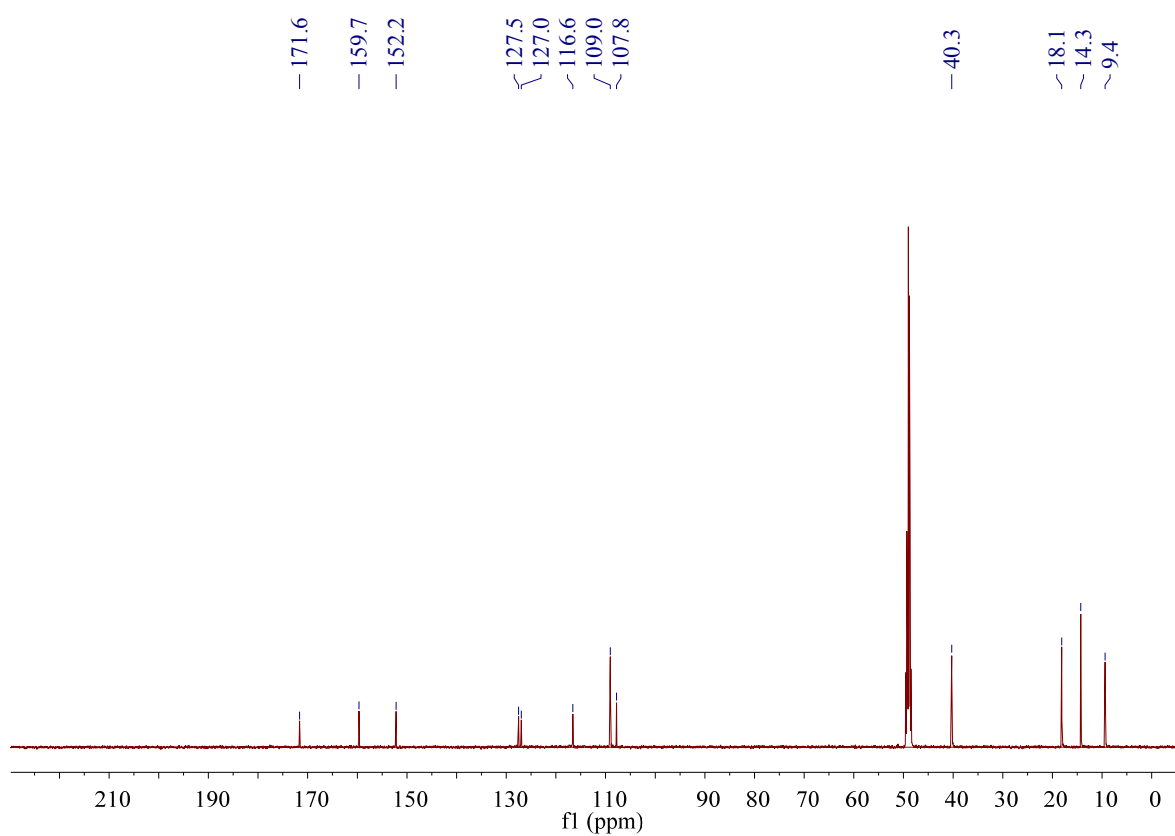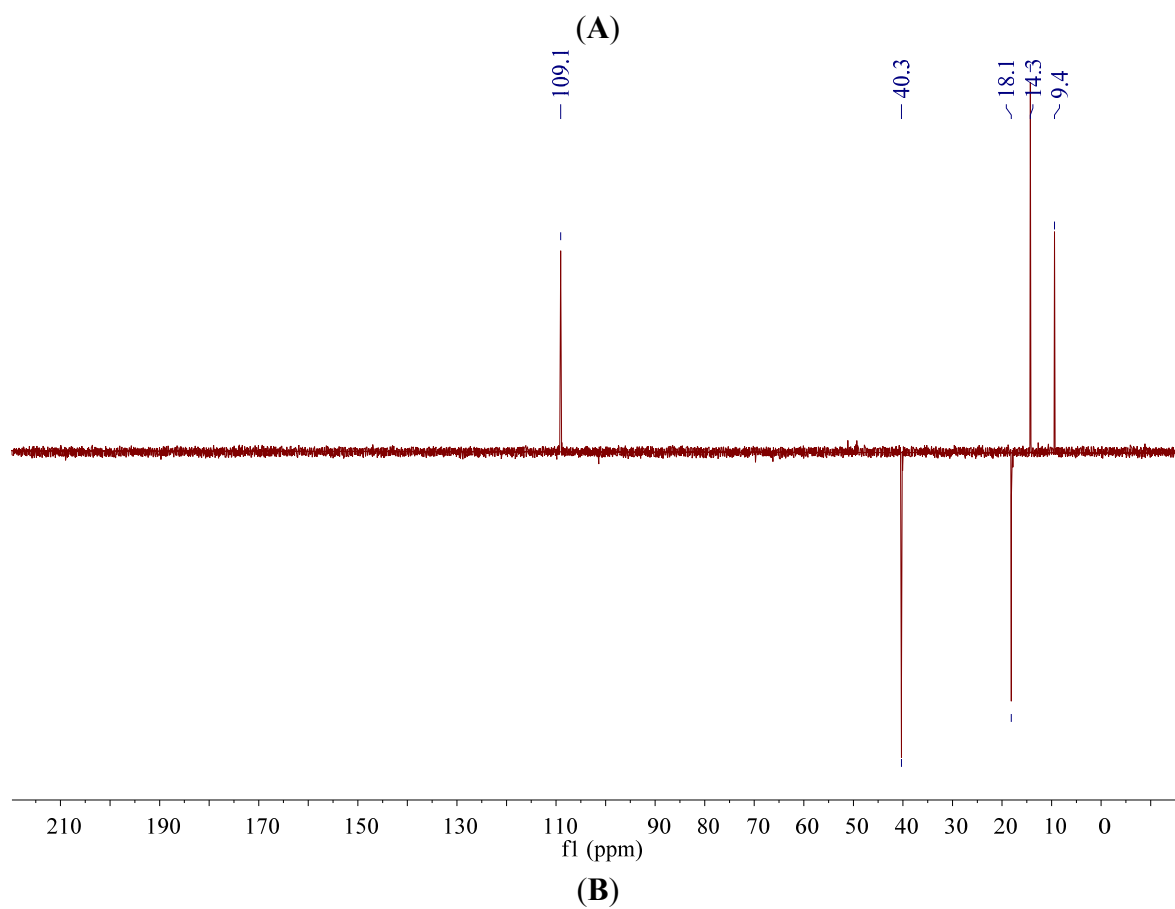

**Figure S21.**  $^{13}\text{C}$  NMR (125 MHz, Methanol- $d_4$ ) (A) and DEPT spectra of Compound **4** (B).

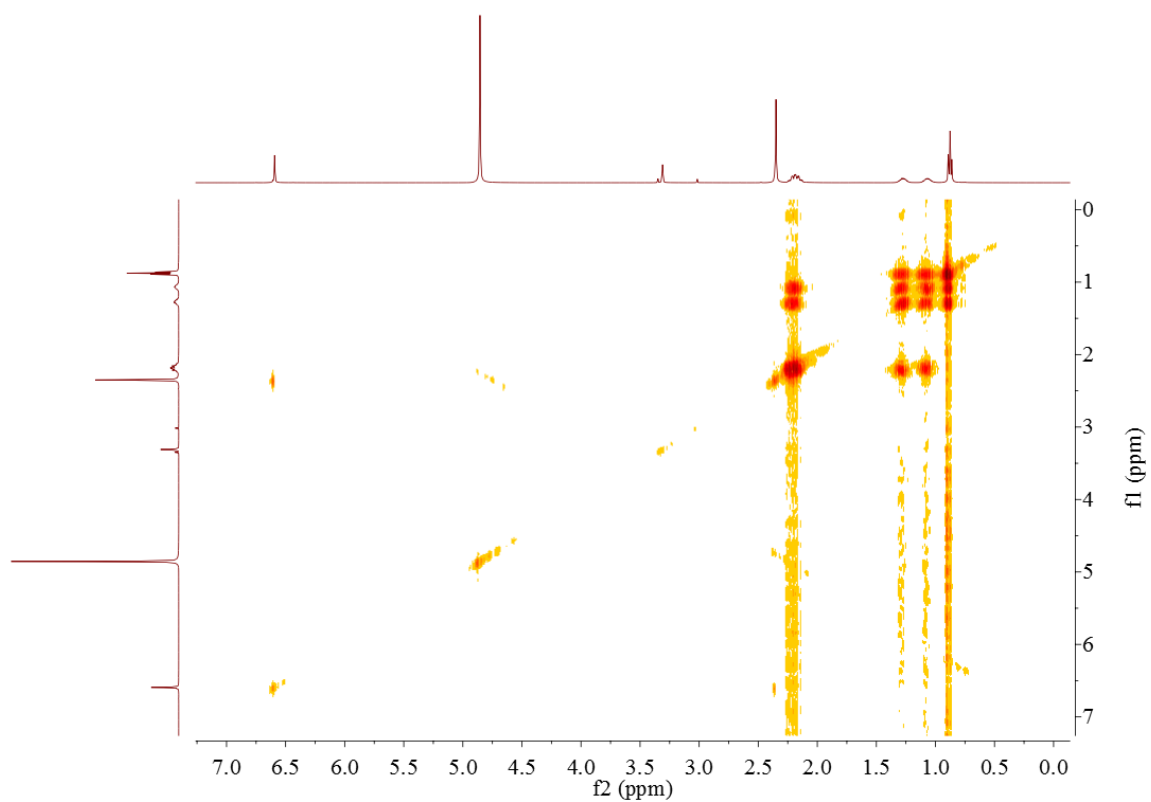

**Figure S22.**  $^1\text{H}$ - $^1\text{H}$  COSY spectrum of Compound 4.

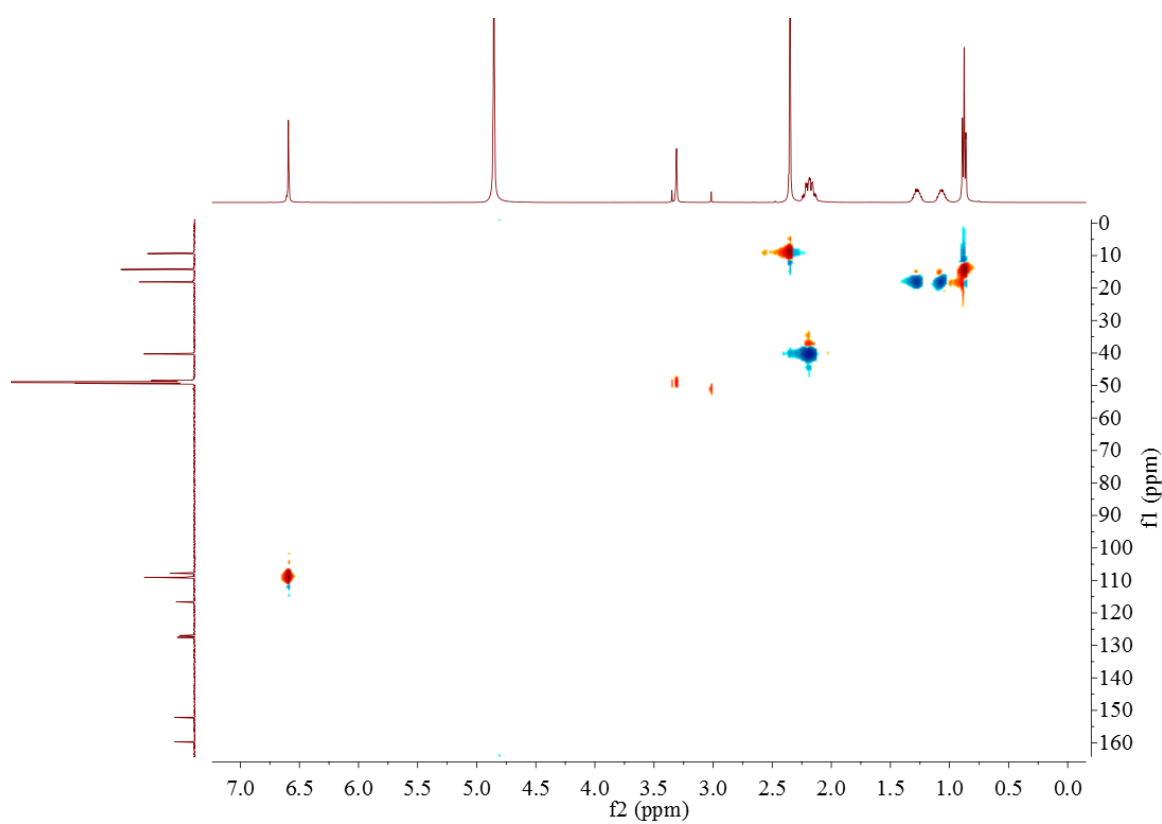

**Figure S23.** HSQC spectrum of Compound 4.

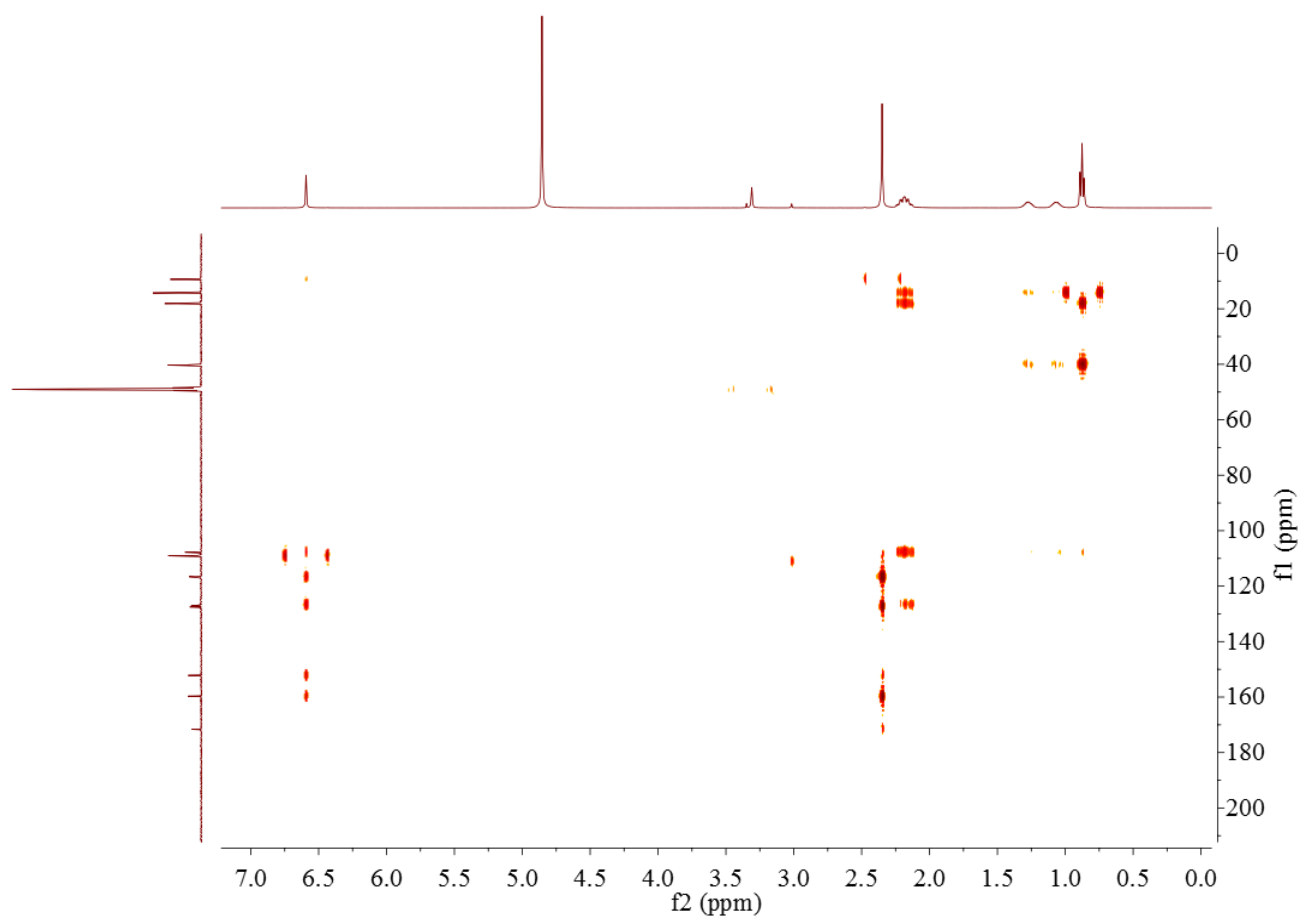

**Figure S24.** HMBC spectrum of Compound 4.

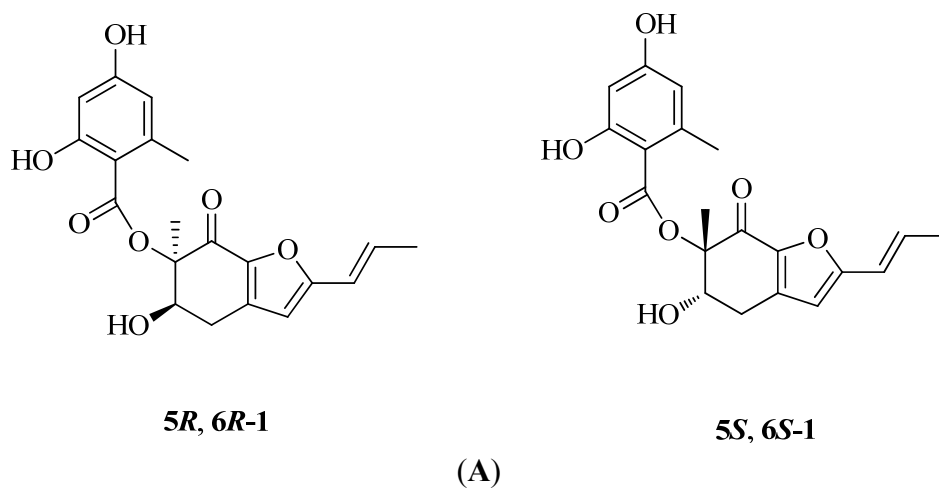

**Figure S25.** Cont.

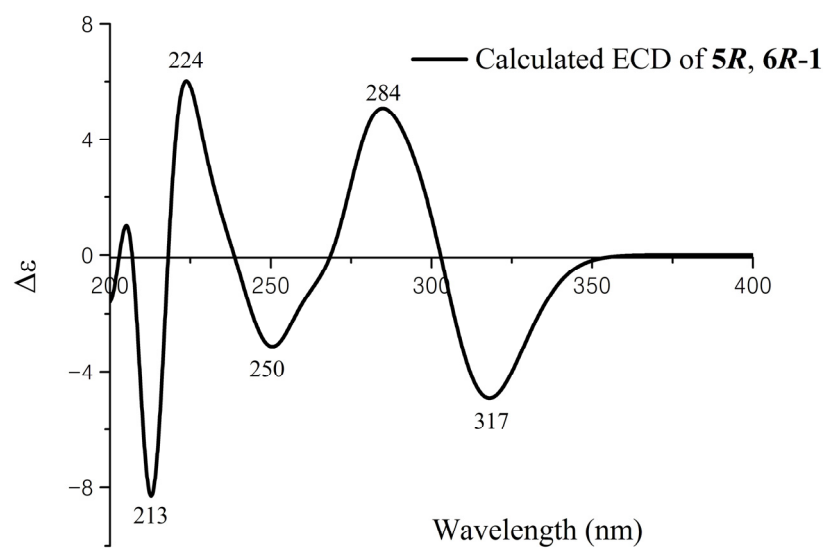

(B)

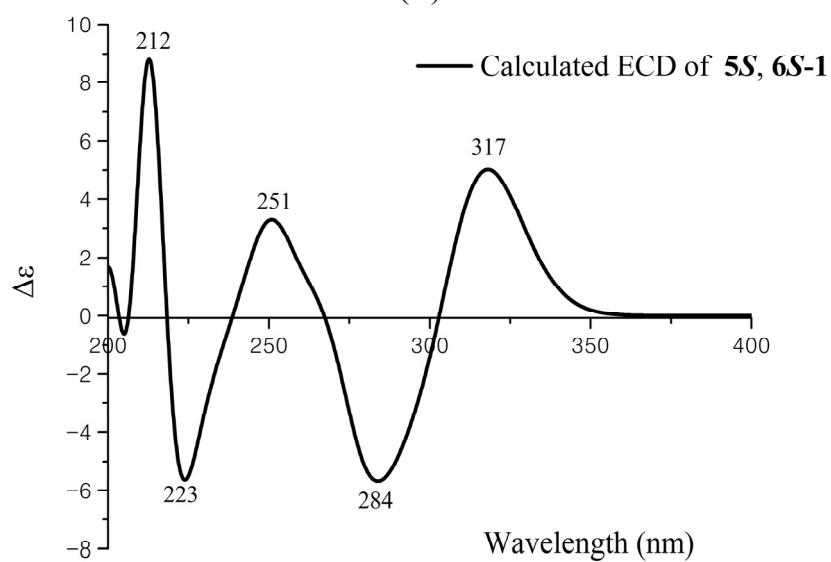

(C)

**Figure S25.** The structures (A) and calculated ECD spectra of the two isomers of **5R,6R-1** (B) and **5S,6S-1** (C).



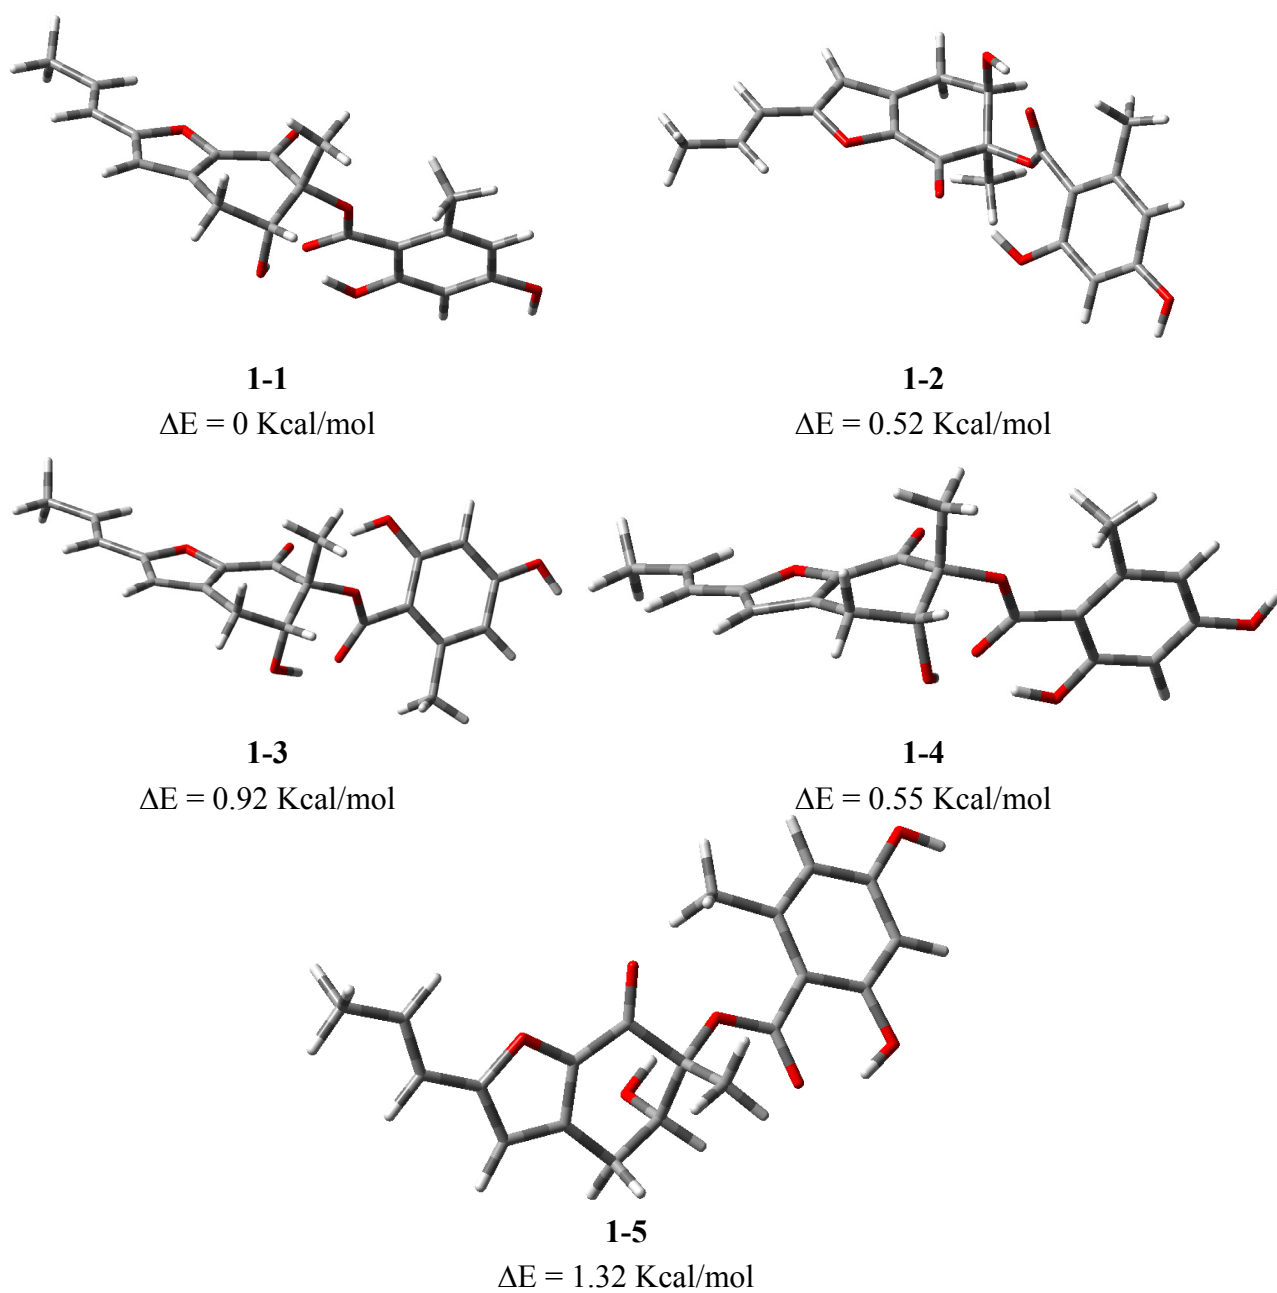

**Figure S26.** DFT-optimized low-energy structures (1-1–1-5) for 5*R*,6*R*.

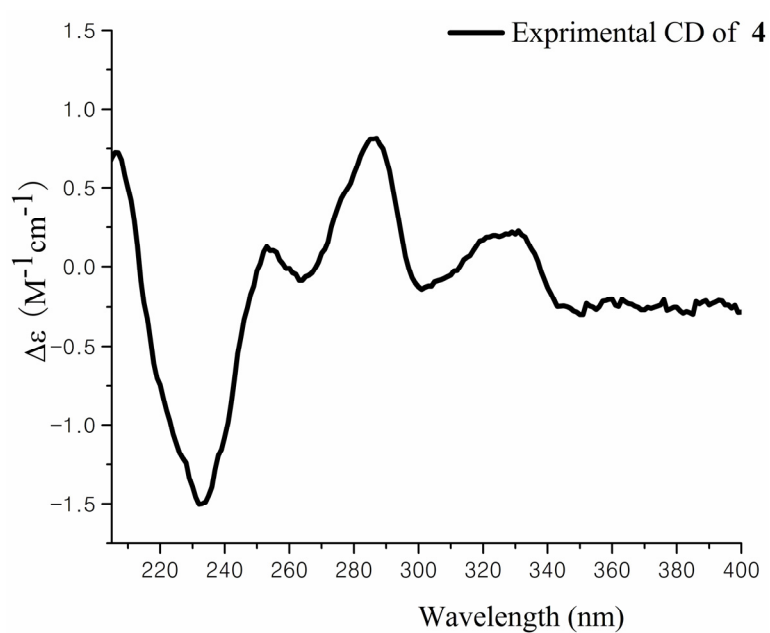

**Figure S27.** CD spectrum of Compound 4.

© 2015 by the authors; licensee MDPI, Basel, Switzerland. This article is an open access article distributed under the terms and conditions of the Creative Commons Attribution license (<http://creativecommons.org/licenses/by/4.0/>).
